# Supplementary material for: The product of NH 3 loss from gas phase protonated tyrosine
Source: Royal Society of Chemistry journal article supplement (doi:10.1039/d5cp04446d), 2026-01-01
Supplement: d5cp04446d1.pdf [file d5cp04446d1.pdf]

## Supporting Information for

# The Product of NH<sub>3</sub> loss from Gas Phase Protonated Tyrosine

Griffin Loeb sack,<sup>a,b,c,†</sup> Neville J. A. Coughlan,<sup>a,b,‡</sup> Lara van Tetering,<sup>d,e</sup> Yuting Li,<sup>a,b</sup> Nour Mashmoushi,<sup>a,b</sup> Yiming Xiao,<sup>a</sup> Mircea Guna,<sup>f</sup> Bradley B. Schneider,<sup>f</sup> J. C. Yves Le Blanc,<sup>f</sup> Jonathan Martens,<sup>d,e</sup> and W. Scott Hopkins<sup>a,b,c\*</sup>

<sup>a</sup> Department of Chemistry, University of Waterloo, 200 University Avenue West, Waterloo, Ontario, N2L 3G1, Canada.

<sup>b</sup> Waterloo Institute of Nanotechnology, University of Waterloo, 200 University Avenue West, Waterloo, Ontario, N2L 3G1, Canada

<sup>c</sup> WaterFEL Free Electron Laser Laboratory, University of Waterloo, 200 University Avenue West, Waterloo, Ontario, N2L 3G1, Canada.

<sup>d</sup> HFML-FELIX, Toernooiveld 7, 6525 ED Nijmegen, the Netherlands

<sup>e</sup> Institute for Molecules and Materials, Radboud University, Heyendaalseweg 135, 6525 AJ Nijmegen, the Netherlands

<sup>f</sup> SCIE X, Four Valley Drive, Concord, Ontario, L4K V48, Canada

## Table of Contents

|                                                                                                                                                                                                                                                                                                                                                                                                                                                            |    |
|------------------------------------------------------------------------------------------------------------------------------------------------------------------------------------------------------------------------------------------------------------------------------------------------------------------------------------------------------------------------------------------------------------------------------------------------------------|----|
| <b>Figure S1.</b> (A) The ionogram plot for $[\text{Tyr} + \text{H}]^+$ electrosprayed from 50:50 MeOH:H <sub>2</sub> O with 0.5% formic acid solution in and N <sub>2</sub> environment at SV=3000V and (B) the dispersion plot for $[\text{Tyr} + \text{H}]^+$ in N <sub>2</sub> gas with the selected SV for A shown in blue. The error bars depict the full width half maximum (FWHM) of the DMS ionogram peak. ....                                   | 1  |
| <b>Figure S2.</b> The geometries for the (A) N-protonated, (B) O-protonated, and (C) hydroxy O-protonated prototropic isomers of $[\text{Tyr} + \text{H}]^+$ optimized at the $\omega$ B97X-D3BJ / def2-TZVPP level of theory. ....                                                                                                                                                                                                                        | 2  |
| <b>Figure S3.</b> (A) The experimental UVPD action spectrum of $[\text{Tyr} + \text{H}]^+$ , and the thermally averaged (T = 298 K) calculated VG FC vibronic spectra for (B) N-protonated, (C) O-protonated, and (D) hydroxy O-protonated prototropic isomers of $[\text{Tyr} + \text{H}]^+$ . Calculations were conducted at the $\omega$ B97X-D3BJ / def2-TZVPP level of theory. A spectra shift of -0.3 eV was applied for the VG FC predictions. .... | 3  |
| <b>Figure S4.</b> (A) The calculated spectra for (A) N-protonated, (C) O-protonated, and (D) hydroxy O-protonated prototropic isomers of $[\text{Tyr} + \text{H}]^+$ from the ground electronic state S <sub>0</sub> to S <sub>n</sub> using the VG FC approximation and the sum of the S <sub>1</sub> to S <sub>7</sub> transitions (lower). ....                                                                                                         | 4  |
| <b>Figure S5.</b> The calculated transition orbitals (HOTO-LUTO) associated with S <sub>n</sub> →S <sub>0</sub> transitions for the N-protonated prototropic isomer of $[\text{Tyr} + \text{H}]^+$ . ....                                                                                                                                                                                                                                                  | 5  |
| <b>Figure S6.</b> The UVPD action spectra for $[\text{Tyr} + \text{H}]^+$ as monitored in product channels (A) m/z 91, (B) m/z 95, (C) m/z 107, (D) m/z 119, (E) m/z 124, (F) m/z 147, (G) sum of fragments. ....                                                                                                                                                                                                                                          | 6  |
| <b>Figure S7.</b> Mobiligrams of (A) $[\text{Tyr} + \text{H}]^+$ (m/z 182) and (B) $[\text{Tyr} - \text{NH}_3 + \text{H}]^+$ (m/z 165) measured using a Waters Synapt G2-Si HDMS mass spectrometer equipped with a TWIMS cell. ....                                                                                                                                                                                                                        | 7  |
| <b>Figure S8.</b> The UVPD action spectra of $[\text{Tyr} + \text{H}]^+$ (m/z 165) and $[\text{Tyr} - \text{NH}_3 + \text{H}]^+$ (m/z 182). $[\text{Tyr} - \text{NH}_3 + \text{H}]^+$ was generated via CID in Q2, then trapped in Q3 for laser interrogation. ....                                                                                                                                                                                        | 8  |
| <b>Figure S9.</b> The calculated harmonic vibronic spectra of the benzyl cation and phenonium isomers of $[\text{Tyr} - \text{NH}_3 + \text{H}]^+$ calculated at the $\omega$ B97X-D3BJ / def2-TZVPP level of theory. ....                                                                                                                                                                                                                                 | 9  |
| <b>Figure S10.</b> IRIS isomer population analysis curve with increasing laser pulses performed at 944 cm <sup>-1</sup> . ....                                                                                                                                                                                                                                                                                                                             | 10 |

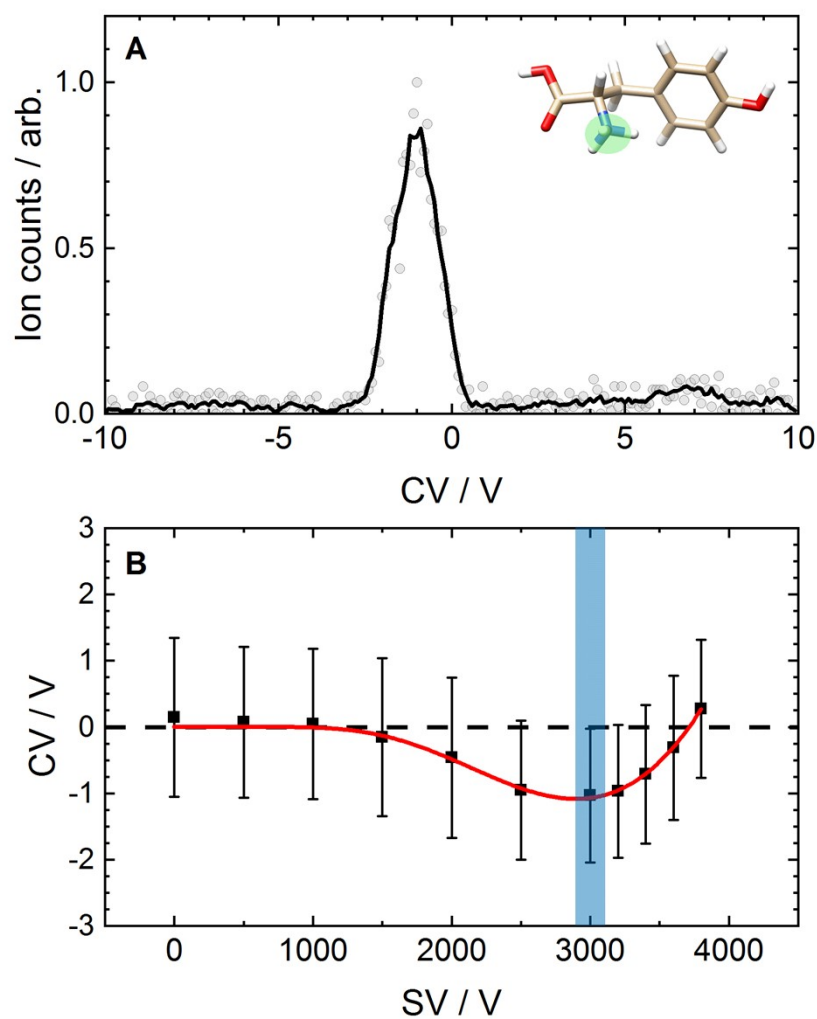

**Figure S1.** (A) The ionogram plot for  $[\text{Tyr} + \text{H}]^+$  electrosprayed from 50:50 MeOH:H<sub>2</sub>O with 0.5% formic acid solution in and N<sub>2</sub> environment at SV=3000V and (B) the dispersion plot for  $[\text{Tyr} + \text{H}]^+$  in N<sub>2</sub> gas with the selected SV for A shown in blue. The error bars depict the full width half maximum (FWHM) of the DMS ionogram peak.

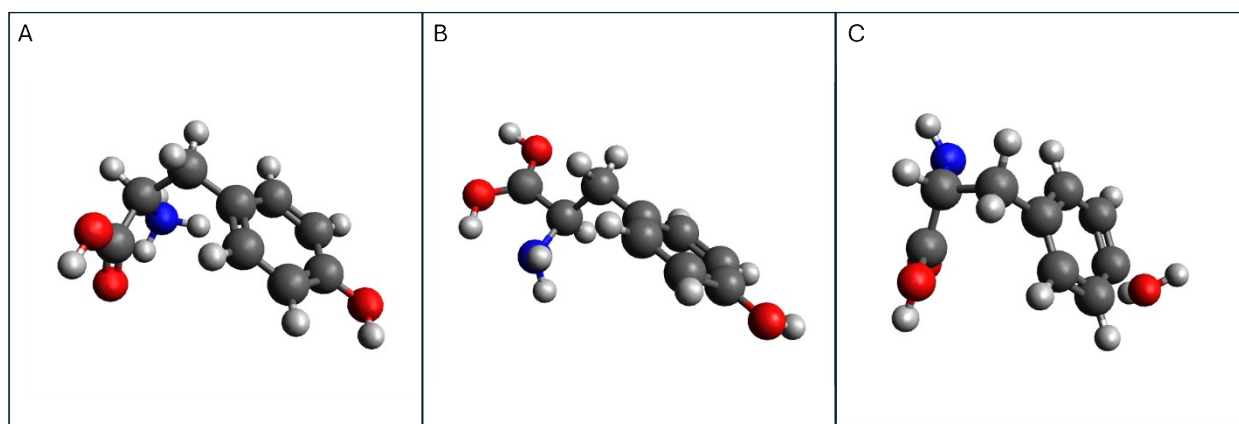

**Figure S2.** The geometries for the (A) N-protonated, (B) O-protonated, and (C) hydroxy O-protonated prototropic isomers of  $[\text{Tyr} + \text{H}]^+$  optimized at the  $\omega\text{B97X-D3BJ} / \text{def2-TZVPP}$  level of theory.

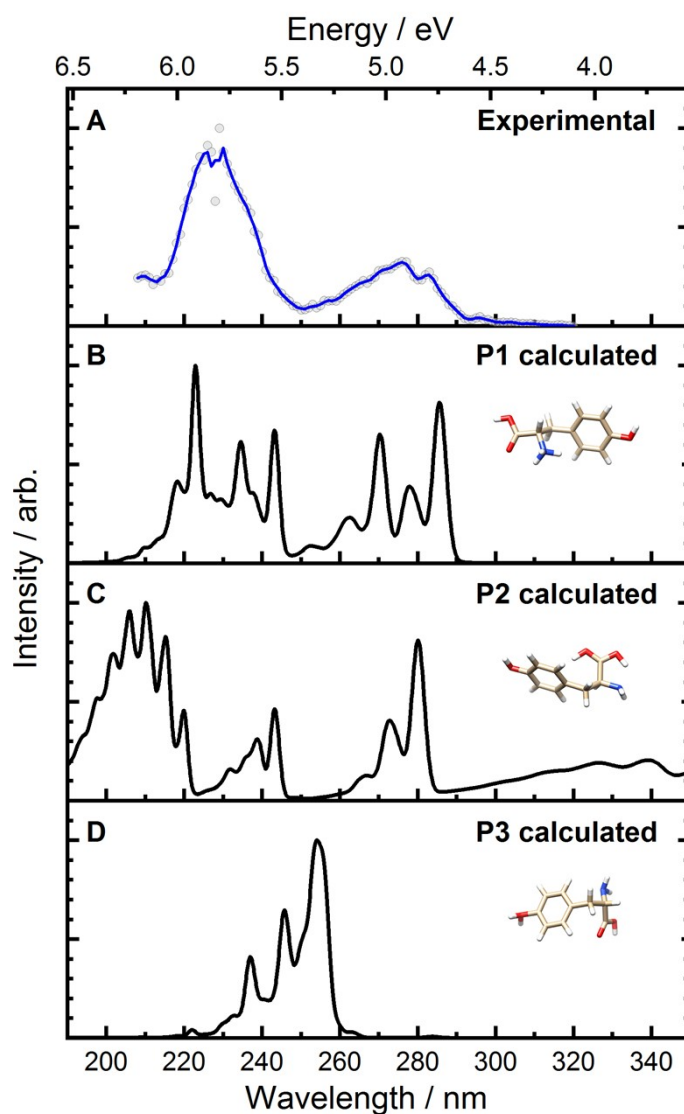

**Figure S3.** (A) The experimental UVPD action spectrum of [Tyr + H]<sup>+</sup>, and the thermally averaged (T = 298 K) calculated VG|FC vibronic spectra for (B) N-protonated, (C) O-protonated, and (D) hydroxy O-protonated prototropic isomers of [Tyr + H]<sup>+</sup>. Calculations were conducted at the  $\omega$ B97X-D3BJ / def2-TZVPP level of theory. A spectra shift of  $-0.3$  eV was applied for the VG|FC predictions.

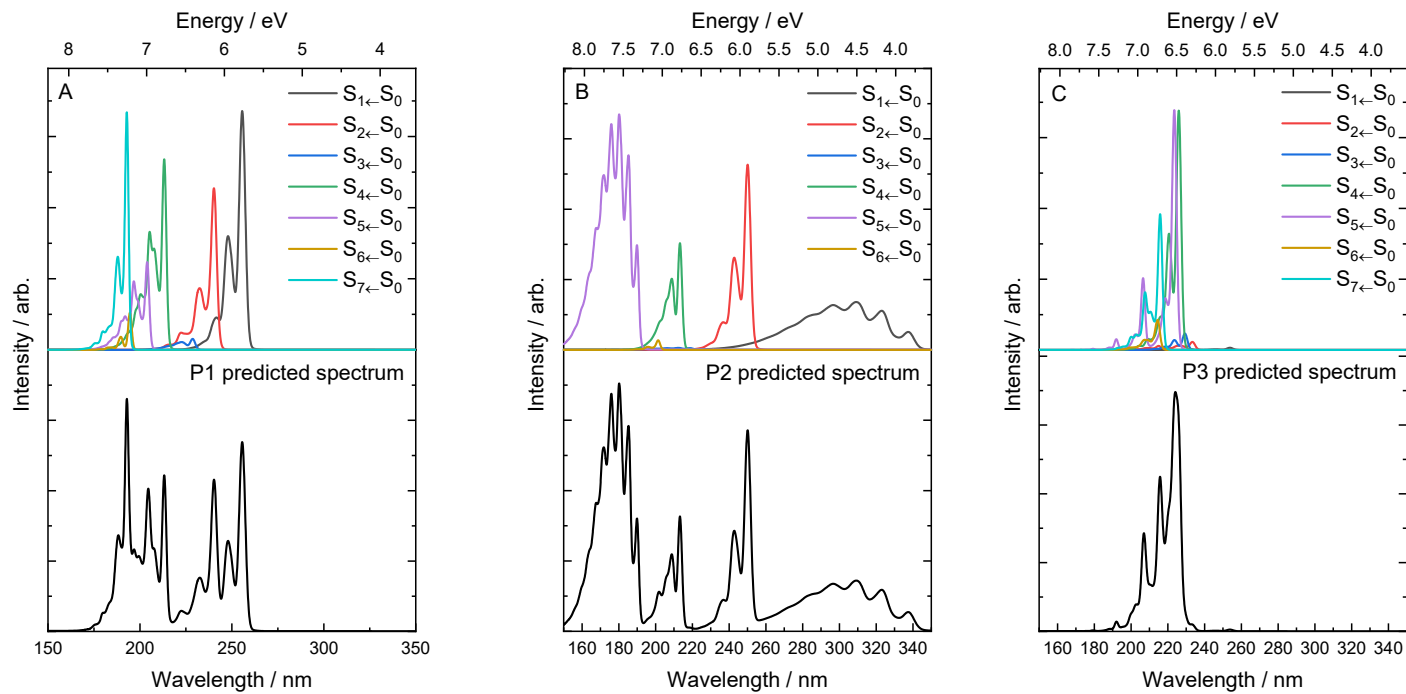

**Figure S4.** (A) The calculated spectra for (A) N-protonated, (C) O-protonated, and (D) hydroxy O-protonated prototropic isomers of  $[\text{Tyr} + \text{H}]^+$  from the ground electronic state  $S_0$  to  $S_n$  using the VG|FC approximation and the sum of the  $S_1$  to  $S_7$  transitions (lower).

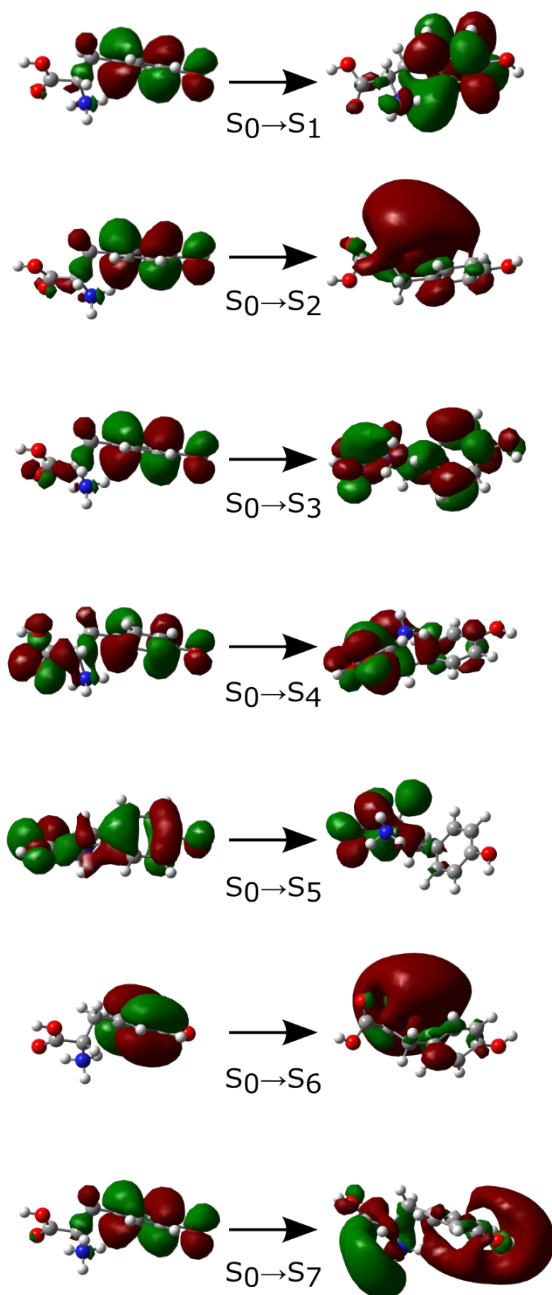

**Figure S5.** The calculated transition orbitals (HOTO-LUTO) associated with  $S_n \rightarrow S_0$  transitions for the N-protonated prototropic isomer of  $[\text{Tyr} + \text{H}]^+$ .

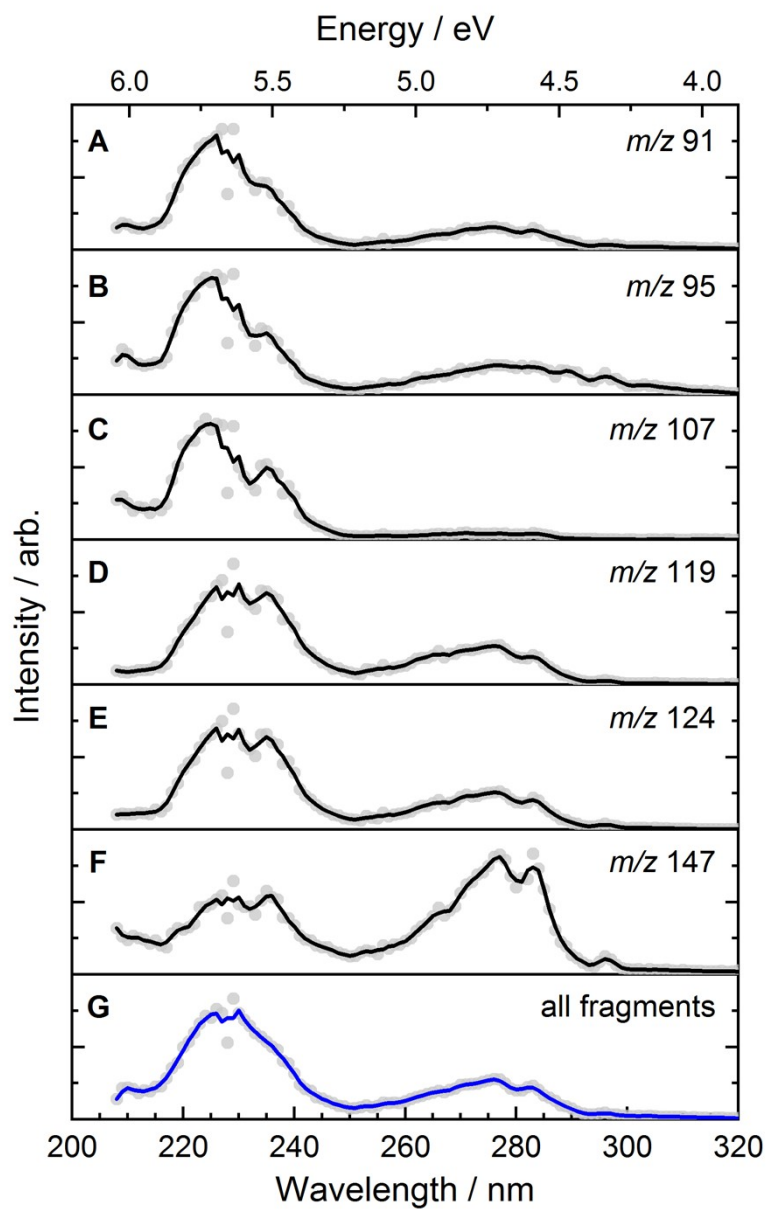

**Figure S6.** The UVPD action spectra for  $[\text{Tyr} + \text{H}]^+$  as monitored in product channels (A)  $m/z$  91, (B)  $m/z$  95, (C)  $m/z$  107, (D)  $m/z$  119, (E)  $m/z$  124, (F)  $m/z$  147, (G) sum of fragments.



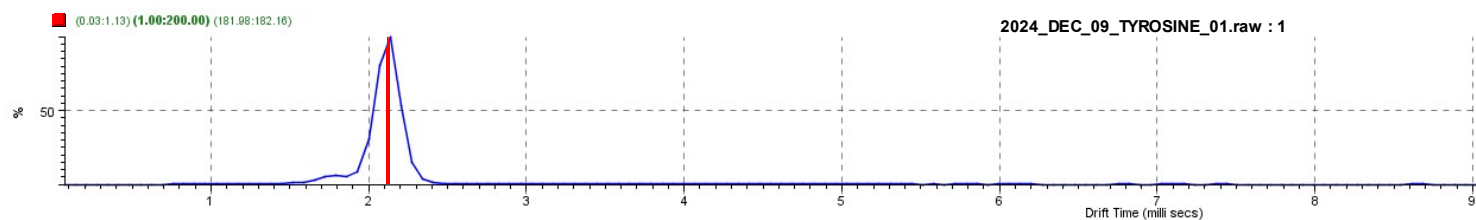

A

B

**Figure S7.** Mobiligrams of (A)  $[\text{Tyr} + \text{H}]^+$  ( $m/z$  182) and (B)  $[\text{Tyr} - \text{NH}_3 + \text{H}]^+$  ( $m/z$  165) measured using a Waters Synapt G2-Si HDMS mass spectrometer equipped with a TWIMS cell.

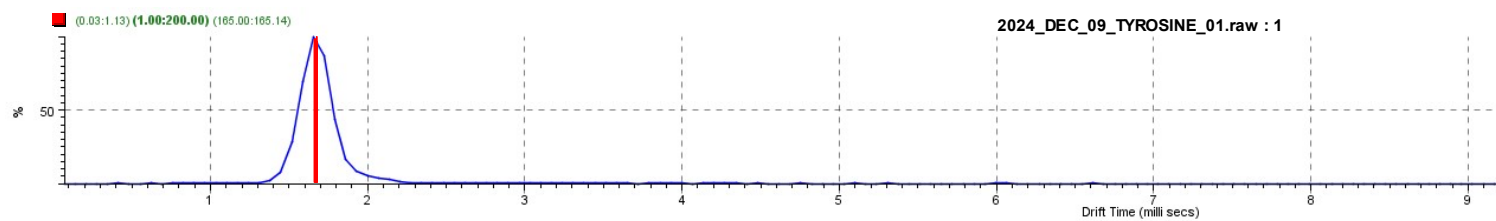

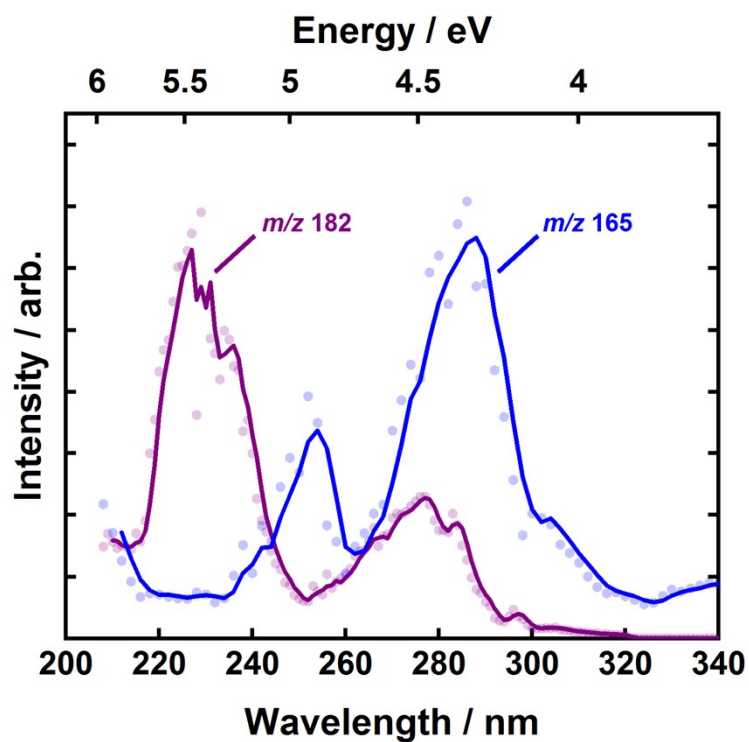

**Figure S8.** The UVPD action spectra of  $[\text{Tyr} + \text{H}]^+$  ( $m/z$  165) and  $[\text{Tyr} - \text{NH}_3 + \text{H}]^+$  ( $m/z$  182).  $[\text{Tyr} - \text{NH}_3 + \text{H}]^+$  was generated via CID in Q2, then trapped in Q3 for laser interrogation.

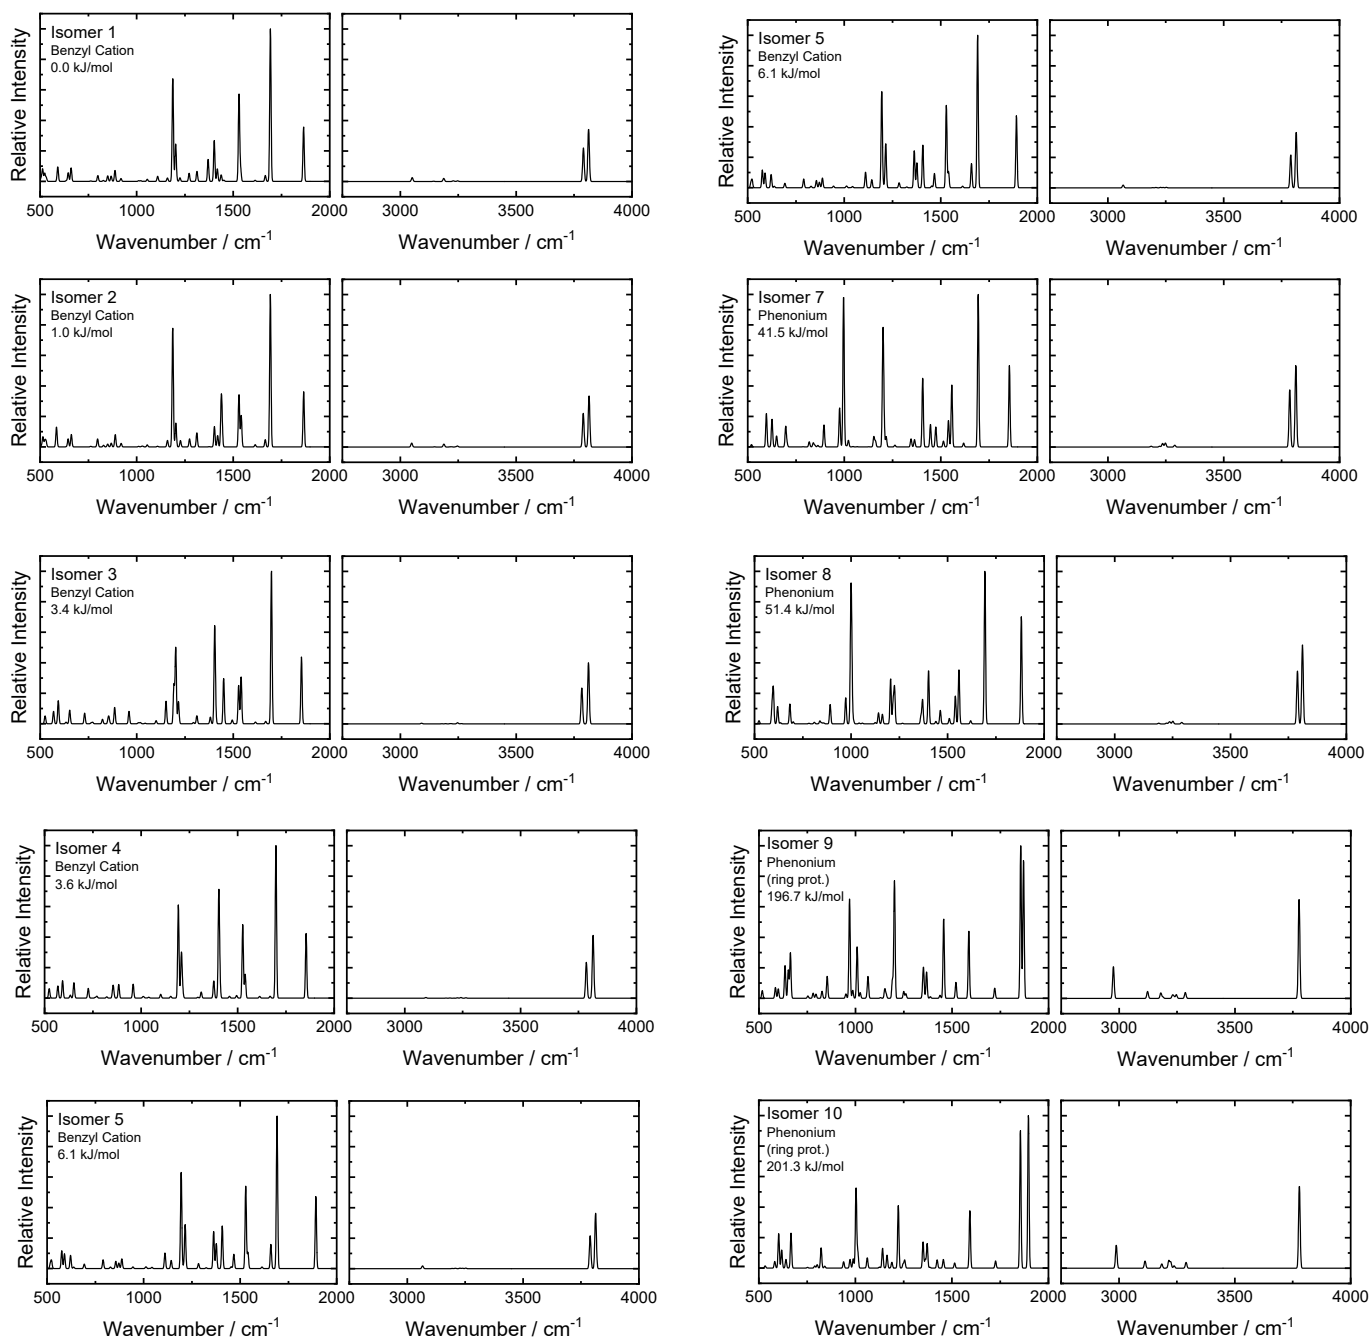

**Figure S9.** The calculated harmonic vibronic spectra of the benzyl cation and phenonium isomers of  $[\text{Tyr} - \text{NH}_3 + \text{H}]^+$  calculated at the  $\omega\text{B97X-D3BJ} / \text{def2-TZVPP}$  level of theory.

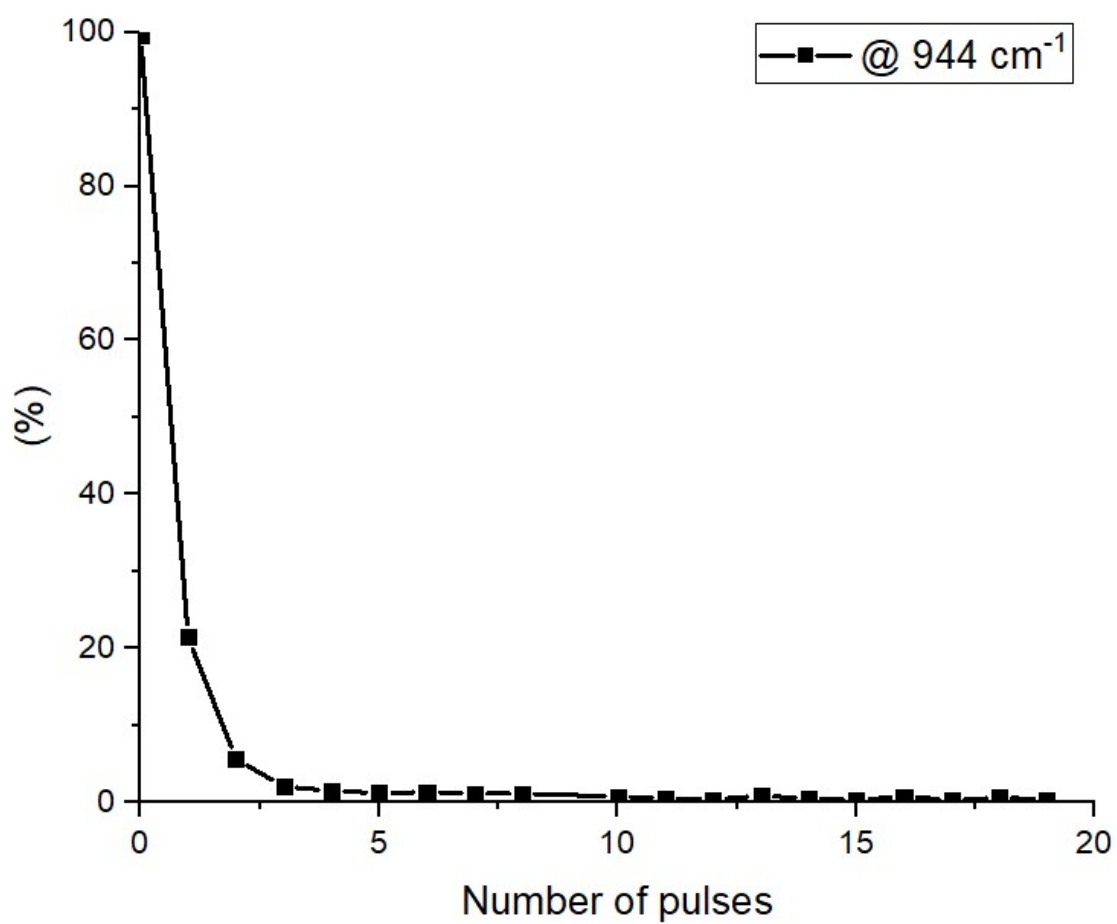

**Figure S10.** IRIS isomer population analysis curve with increasing laser pulses performed at 944 cm<sup>-1</sup>.
